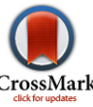

# IL-4 and IL-13 Differentially Regulate TLR-Induced Eosinophil-Basophil Differentiation of Cord Blood CD34<sup>+</sup> Progenitor Cells

Pia Reece<sup>1</sup>, Gail M. Gauvreau<sup>1</sup>, Roma Sehmi<sup>2</sup>, Judah A. Denburg<sup>1\*</sup>

<sup>1</sup> Division of Clinical Immunology & Allergy, McMaster University, Hamilton, Ontario, Canada, <sup>2</sup> Asthma Research Group, Firestone Institute for Respiratory Health, McMaster University Hamilton, Ontario, Canada

## Abstract

Intrauterine environmental exposures have been shown to influence neonatal immunity and subsequent allergic disease development. We have previously shown that fewer lipopolysaccharide (LPS)-stimulated eosinophil-basophil (Eo/B) colonies grow from cord blood (CB) of high-atopic risk infants, compared to low-atopic risk infants. In the present study, we investigated whether a surrogate *ex vivo* T<sub>H</sub>2 milieu (i.e., either IL-4 or IL-13) could represent an underlying mechanism to explain our previous findings. CB CD34<sup>+</sup> cells from healthy donors were cultured with IL-4 or IL-13 (in combination with LPS) and assessed for Eo/B differentiation using methylcellulose cultures and flow cytometry for related intracellular signalling pathways. Pharmacological inhibitors were added to the methylcellulose cultures to determine the effect of blocking intracellular signalling in CB CD34<sup>+</sup> cells in relation to Eo/B colony forming unit (CFU) formation. Stimulation of CD34<sup>+</sup> cells with IL-4, but not IL-13, reduced Eo/B CFU formation in the presence of LPS; this was found to be dependent on IL-4R $\alpha$  and not IL-13R $\alpha$ 1. Additionally, IL-4 reduced the expression of ERK 1/2 after LPS stimulation, which was recovered by inhibition of IL-4R $\alpha$ . While IL-13 did not have an inhibitory effect on ERK 1/2 expression, inhibition of ERK 1/2 significantly reduced Eo/B CFU formation. Thus, the responsiveness of CB CD34<sup>+</sup> progenitor cells to LPS is differentially regulated by the T<sub>H</sub>2 cytokines, IL-4 and IL-13. This may have implications for *in utero* interactions between placental-derived pro-allergic cytokines and neonatal progenitor cells influencing Eo/B-mediated inflammatory responses in early life.

**Citation:** Reece P, Gauvreau GM, Sehmi R, Denburg JA (2014) IL-4 and IL-13 Differentially Regulate TLR-Induced Eosinophil-Basophil Differentiation of Cord Blood CD34<sup>+</sup> Progenitor Cells. PLoS ONE 9(6): e100734. doi:10.1371/journal.pone.0100734

**Editor:** Nick Gay, University of Cambridge, United Kingdom

**Received:** December 16, 2013; **Accepted:** May 30, 2014; **Published:** June 27, 2014

**Copyright:** © 2014 Reece et al. This is an open-access article distributed under the terms of the Creative Commons Attribution License, which permits unrestricted use, distribution, and reproduction in any medium, provided the original author and source are credited.

**Funding:** This work is supported by a grant from CIHR [MOP 111029]. The funders had no role in study design, data collection and analysis, decision to publish, or preparation of the manuscript.

**Competing Interests:** The authors have declared that no competing interests exist.

\* Email: denburg@mcmaster.ca

## Introduction

The dramatic and recent rise in allergies, along with their early onset suggests that *in utero* events are critical to the development of allergies [1]. Environments rich in microbes, such as farming environments, appear to protect against the development of allergies in children, especially when the exposure is pre-natal [2]. These protective effects are associated with alterations in both the neonatal innate [3,4] and adaptive [5] immune systems. These studies suggest that the microenvironment of the uterus plays a key role in shaping the infant's response to environmental stimuli, which subsequently influences the development of allergy [1]. Although it is unknown how the maternal environment may exert such effects, it is tempting to speculate that the fetal immune system interacts with the cytokine milieu prevailing in the mother through the fetal-placental interface [6].

Our group has extensively investigated the role of hematopoietic progenitor cells in infant CB in relation to allergic risk and development of disease [7–10]. We have recently shown that the presence of maternal atopy alters CB progenitor toll-like receptor (TLR) phenotype and function; at-risk infant CD34<sup>+</sup> cells express reduced TLRs with muted LPS-induced Eo/B CFU [10], compared to low-risk infants. Since LPS can induce Eo/B CFU from CD34<sup>+</sup> cells via autocrine activation of MAPK [11] and

atopic at-risk infants have elevated T<sub>H</sub>2 cytokines in their CB [12,13], we were interested in what effect these cytokines may have on LPS-induced Eo/B CFU [10]. Relatedly, maternal cytokines (which can be transferred to the CB) have been shown to play instructive roles in fetal immune development. For example, increased maternal T<sub>H</sub>2 cytokines relate to both neonatal IgE production [14] and T regulatory cell numbers [6]. Additionally, there are strong correlations between maternal placentally-derived and CB-derived cytokine production [15]. Therefore, with the ability of maternal factors, such as cytokines in the intrauterine environment [15], to alter neonatal immune responses [6], we investigated the effect of a prototypical atopic T<sub>H</sub>2 milieu on hematopoietic progenitor cell responses to LPS.

The T<sub>H</sub>2 cytokines IL-4 and IL-13 are secreted by a variety of leukocytes and play an important role in the development of allergic responses. These cytokines are involved in IgE production [16] and eosinophil recruitment to the airways [17]. The expression of IL-4 is increased in the airways of allergic subjects [18] and in the CB of at-risk infants who subsequently develop atopic disease [12,13]. Although these cytokines have recently been shown to influence human CB CD34<sup>+</sup> cell chemotaxis [19] and murine bone marrow (BM) Eo/B CFU formation *ex vivo* [20]

it is unclear what effects IL-4 or IL-13 might have on LPS-induced Eo/B CFU formation from human CB CD34<sup>+</sup> cells.

In this study, we investigated whether the T<sub>H</sub>2 cytokines IL-4 and IL-13 influence LPS-induced Eo/B CFU of CB progenitor cells. We hypothesized that TLR-induced signalling may be altered by T<sub>H</sub>2 cytokines, representative of an “atopic milieu”, resulting in reduced Eo/B CFU [10]. In fact, we demonstrated that IL-4:IL-4R $\alpha$  inhibits LPS-induced Eo/B CFU by blocking ERK 1/2 signalling in CB CD34<sup>+</sup> cells. Since Eo/B differentiation is altered in children at risk for allergy [7–10], improved understanding of Eo/B differentiation processes may permit novel approaches targeting the regulation of these cells and the modulation of Eo/B-mediated allergic inflammation in early life.

## Materials and Methods

### Ethics statement

Pregnant mothers admitted to the Labour and Delivery ward at McMaster University Medical Centre, Hamilton, ON, Canada provided written consent for CB donation prior to delivery. This study was approved by the Hamilton Health Sciences/McMaster Faculty of Health Sciences Research Ethics Board.

### Cord blood collection

The CB samples were collected from otherwise healthy pregnant women. Upon delivery, each CB sample was collected in a 60 mL syringe containing 2 mL of heparin (1000 units/mL; Sigma, Mississauga, ON) and stored at 4°C until processing.

### Cord blood processing and CD34<sup>+</sup> cell enrichment

CB samples were depleted of erythrocytes using gravity sedimentation as previously described [10]. To enrich the sample for CD34<sup>+</sup> cells, mononuclear cells from the centrifuged pellet were selected using the EasySep Negative Selection Human Progenitor Cell Enrichment Cocktail with CD41 depletion (Stem Cell Technologies) as previously described [11]. The purity of CD34<sup>+</sup> cells was between 85–90%.

### Methylcellulose cultures

Methylcellulose colony assays were grown for 14 days as previously described [10] using enriched CB CD34<sup>+</sup> at a plating concentration of  $2 \times 10^4$  cells/35 mm  $\times$  10 mm culture dish (Falcon Plastics, CA) in duplicate [11]. In addition to growth factors IL-3 (1 ng/mL), IL-5 (1 ng/mL) and GM-CSF (10 ng/mL) and the endotoxin LPS (10  $\mu$ g/mL), cultures were supplemented with IL-4 or IL-13 (50 ng/mL) to assess their role in Eo/B CFU formation. For receptor blocking/neutralization experiments, anti-IL-4R $\alpha$  or -IL-13R $\alpha$ 1 (5 and 50  $\mu$ g/mL; R&D Systems) were added to the methylcellulose cultures supplemented with IL-4, LPS and hematopoietic cytokines.

The role of LPS-induced signalling on Eo/B CFU formation was investigated by adding the specific inhibitors to the methylcellulose culture assay: 5 or 50  $\mu$ M PD98059 (ERK 1/2 inhibitor) [21], or 2 or 20  $\mu$ M SB203580 (p38 MAPK inhibitor) [22] (Calbiochem, Cambridge, MA) or DMSO vehicle control. These concentrations were found to be non-toxic to cells [11].

### Phospho-flow to detect intracellular activation of signalling pathway molecules

LPS from *Escherichia coli* 0111:B4 was purchased from Sigma and used at the optimal concentration of 10  $\mu$ g/mL as used previously [10]. Enriched CD34<sup>+</sup> cells were stimulated with LPS and IL-4 or IL-13 (50 ng/mL) for 5 min to induce p38 MAPK

expression, or 30 min to induce ERK 1/2 expression at 37°C 5% CO<sub>2</sub> in Multiwell (Falcon) tissue culture plates with RPMI complete (RPMI plain, HEPES, Pen/Strep and FBS). These times were found to increase the expression of these respective proteins in CB CD34<sup>+</sup> cells stimulated with LPS from our previous kinetic evaluations [11]. For receptor neutralization studies, cells were pre-incubated with anti-IL-4R $\alpha$  or IL-13R $\alpha$ 1 (R&D Systems) for 15 min before the addition of IL-4 or IL-13 and LPS. Following the incubation, cells were analyzed using phospho-flow cytometry [11] with a sequential multiparameter gating strategy that has previously been shown to accurately enumerate CD34<sup>+</sup> progenitor cells (Figure 1A) [7–10]. CD34<sup>+</sup> blast cells (R4), are identified as cells with high expression of CD34, low to intermediate expression of CD45, and scatter properties characteristic of lymphoblastic cells. Briefly, cells were fixed using PhosFlow CytoFix Buffer (BD Biosciences, Ontario, Canada), and then centrifuged for 10 min at 1500 RPM. After washing, cells were permeabilized (PhosFlow Perm Buffer III; BD Biosciences) for 30 min on ice, washed with FACS Buffer (PBS, 0.1% sodium azide) then stained with a PE-conjugated phospho-specific mAb against p38 MAPK (pT180/pY182) or ERK 1/2 (pT202/pY204), FITC conjugated CD45 and PerCP conjugated CD34 or isotype control, all purchased from BD Biosciences [11].

### Acquisition and analysis

Acquisition was performed using a LSR II flow cytometer (BD Bioscience);  $5 \times 10^3$  events were collected for analysis. To enumerate CD34<sup>+</sup> cells, we used an established multiparameter gating strategy as previously described [10]. The expression of phosphorylated ERK 1/2 or p38 MAPK was calculated using an expression index of the specific median fluorescence intensity (sMFI):  $sMFI_{stimulated\ cells} / sMFI_{unstimulated\ cells}$  [23].

### Statistical analysis

Data were analyzed using IBM SPSS Statistics version 20.0 (Chicago, IL) and represented in figures as mean  $\pm$  SEM for bar charts or as histograms for MFI data. Data that were not normally distributed were log transformed and subsequently analyzed with the ANOVA with a Dunnett *post hoc* analysis for many groups. We further applied the Mann-Whitney U test to assess the sensitivity or robustness of the results, and the results were consistent. We set the criterion for statistical significance *a priori* at  $\alpha = 0.05$ . All p values were reported to three decimal places.

## Results

### IL-4 and IL-13 differentially influence GM-CSF- and IL-3-responsive Eo/B CFU formation after LPS stimulation

We were first interested in whether the T<sub>H</sub>2 cytokines, IL-4 and IL-13, influence LPS-induced Eo/B CFU formation [11]. To test this, IL-4 and IL-13 were added separately to methylcellulose cultures of CB CD34<sup>+</sup> cells containing hematopoietic cytokine and LPS. As shown in Figure 2A–F, incubation with IL-4 or IL-13 alone was not sufficient to induce Eo/B CFU production. However, the addition of IL-4 to GM-CSF + LPS ( $p = 0.028$ ) or IL-3+LPS ( $p = 0.007$ ) significantly decreased Eo/B CFU compared to these same cultures without IL-4 (Figure 2A–B). Conversely, the addition of IL-13 to any of the cultures with growth factors + LPS did not change the number of Eo/B CFU (Figure 2D–F). As observed in Figure 2C, we did not see significant alterations in IL-5-induced colonies. IL-5 cultures were included in this study as a control, since it is known that Eo/B CFU from IL-5 stimulated cultures are less abundant than CFU from IL-3 or GM-CSF stimulated cultures. Given the low numbers of colonies

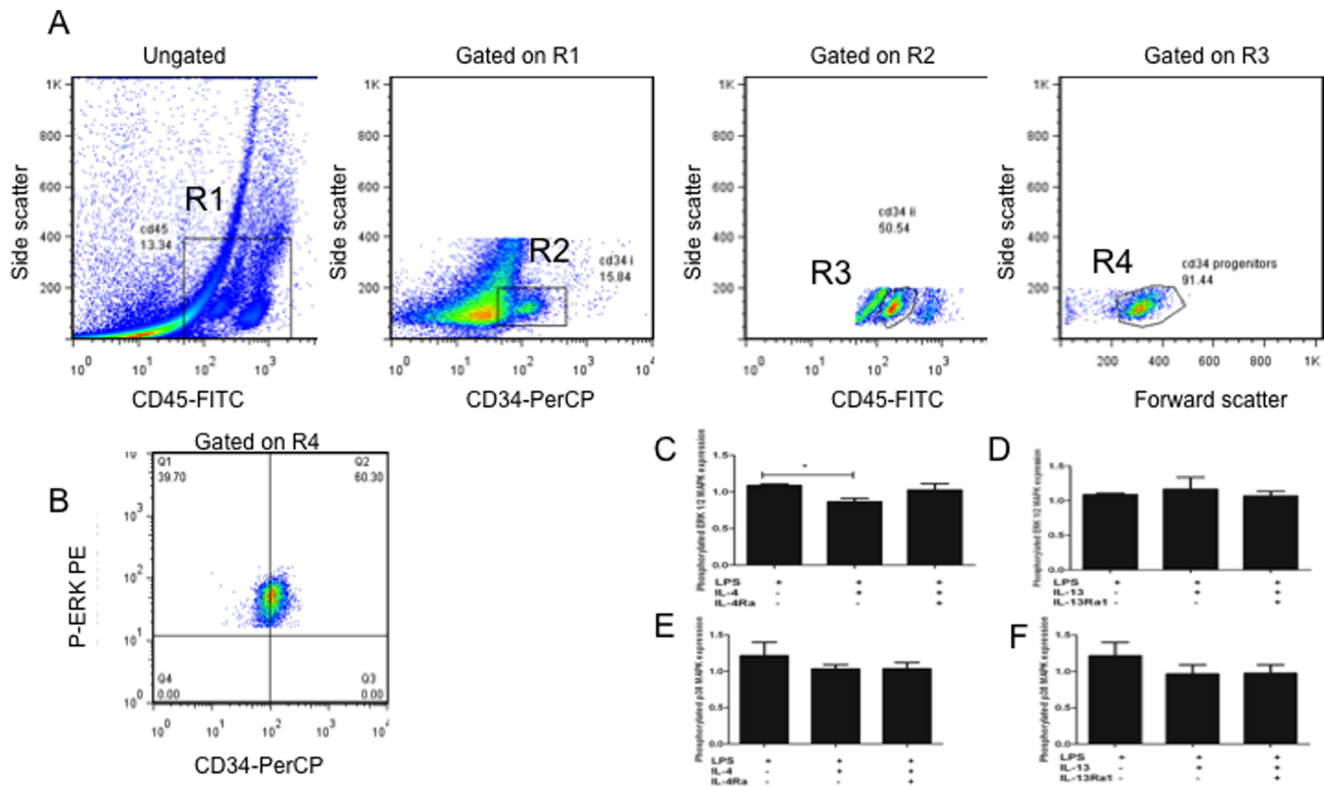

**Figure 1. IL-4, but not IL-13, inhibits LPS-induced ERK 1/2, but not p38 MAPK.** CD34<sup>+</sup> cells were analyzed using phospho-flow cytometry with a sequential multiparameter gating strategy. A. Enumeration of CD34<sup>+</sup> progenitor cells in cord blood. Enriched CB CD34<sup>+</sup> cells were stained with CD34-PerCP and CD45-FITC and analyzed by flow cytometry. Numbers of true CD34<sup>+</sup> blasts were determined by expressing cell numbers in R4 as a percentage of cell numbers in R1. Nonspecific staining with isotype controls were set at 2% in all experiments. A representative experiment is shown. B p-ERK expression on CD34<sup>+</sup> cells (gated on the R4). A representative experiment of ERK staining is shown. Quadrant markers were set such that 2% or less of cells stained with the isotype control. C. CB CD34<sup>+</sup> cells were pre-incubated with anti-IL-4R $\alpha$  (C,E) or anti-IL-13R $\alpha$ 1 (D,F) Abs and stimulated with LPS and IL-4 (C,E) or IL-13 (D,F) respectively. Cells were stained with antibodies to intracellular ERK 1/2 (C,D) or p-38 (E,F) and analyzed using flow cytometry. A bar chart of the MFI expression index data is displayed for IL-4 (C,E) and IL-13 (D,F) data. Data are presented as mean  $\pm$  SEM of 4 experiments and significant findings were determined using ANOVA with post hoc Dunnett comparison and presented by an asterisk (\*),  $p < 0.05$ .

induced by IL-5, we were underpowered to investigate these comparisons.

#### IL-4R $\alpha$ is necessary for IL-4-induced reduction in GM-CSF- and IL-3-responsive Eo/B CFU

To determine whether the inhibitory effect of IL-4 on LPS-induced Eo/B CFU formation (Figure 2A–B) was dependent on IL-4R $\alpha$ , CB enriched CD34<sup>+</sup> cells were incubated with anti-IL-4R $\alpha$  or anti-IL-13R $\alpha$ 1 in the methylcellulose cultures for 14 days. As shown in Figure 3A–B, the addition of anti-IL-4R $\alpha$  to the cultures restored the number of GM-CSF- ( $p = 0.015$ ) and IL-3-responsive ( $p = 0.033$ ) Eo/B CFU formed in the presence of LPS + IL-4. Furthermore, the addition of anti-IL-13R $\alpha$ 1 did not restore the number of GM-CSF- or IL-3-responsive Eo/B CFU formed in the presence of LPS+IL-4 (Figure 3D–E); colony counts remained significantly reduced ( $p = 0.020$  and  $p = 0.040$  respectively) as compared to LPS stimulated cultures. This supports a specific role for IL-4:IL-4R $\alpha$  signalling, independent of IL-13R $\alpha$ 1, in the inhibition of LPS-induced Eo/B CFU.

#### IL-4 and IL-13 differentially influence LPS-induced phosphorylation of ERK 1/2

In order to investigate the potential mechanism of reduced LPS-induced GM-CSF- and IL-3-responsive Eo/B CFU formation in

the presence of IL-4, we next determined if IL-4 had any effect on LPS-induced intracellular signalling [24] in CB CD34<sup>+</sup> cells. To do this, CD34<sup>+</sup> cells were incubated with LPS with or without IL-4 or IL-13 and analyzed using flow cytometry. As shown in Figure 1C, the addition of IL-4 to LPS-stimulated CD34<sup>+</sup> cells resulted in a significant reduction in the expression of ERK 1/2 ( $p = 0.040$ ), whereas the addition of IL-13 did not (Figure 1E). Additionally, pre-incubation with anti-IL-4R $\alpha$  to block IL-4 signalling recovered the expression of ERK 1/2 in the presence of LPS (Figure 1C). We were unable to detect any differences in the expression of phosphorylated p38 MAPK with the addition of IL-4 to LPS-stimulated CD34<sup>+</sup> cells (Figure 1D).

#### Inhibition of ERK 1/2 reduces GM-CSF- and IL-3-responsive Eo/B CFU formation after LPS stimulation

Eosinophilopoiesis is a highly regulated process that has been demonstrated to be dependent on ERK signalling of murine BM CD34<sup>+</sup> cells [21]. Since we found that IL-4 down-regulated LPS induction of ERK 1/2 (Figure 1C), we next assessed the effects of blocking ERK 1/2 in CB CD34<sup>+</sup> cell Eo/B CFU formation in the presence of LPS. As shown in Figure 4A–B, the addition of PD98059, a specific pharmacological inhibitor of ERK 1/2 signalling [21], resulted in reduced GM-CSF- ( $p = 0.009$ ) and IL-3-responsive ( $p = 0.007$ ) Eo/B CFU formation in the presence of

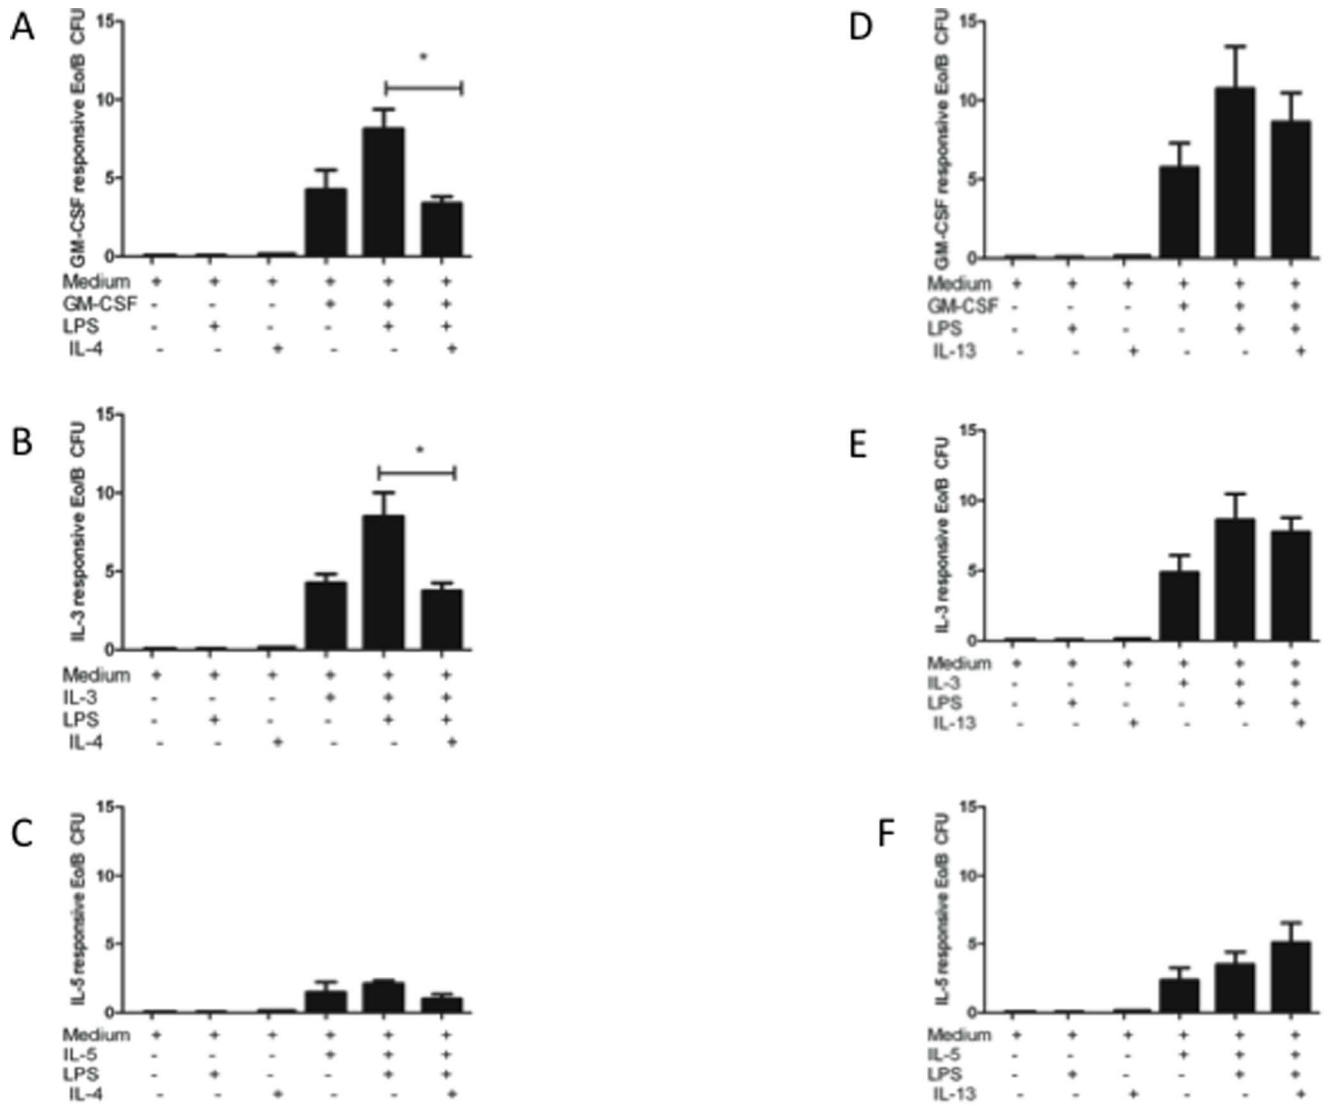

**Figure 2. IL-4, but not IL-13, inhibits LPS-induced Eo/B CFU.** CB CD34<sup>+</sup> cells were cultured for 14 days (5% CO<sub>2</sub>, 37°C) with hematopoietic cytokines (A,D) GM-CSF (10 ng/mL) (B,E) IL-3 (1 ng/mL) (C,F) IL-5 (1 ng/mL), or with or without LPS, (A–C) IL-4, or (D–F) IL-13 (B). Eo/B cultures are tight, granular clusters of 40 cells or more. Data are represented as mean ± SEM of 4 experiments and significant findings were determined using ANOVA with post hoc Dunnett comparison and presented by an asterisk (\*),  $p < 0.05$ . doi:10.1371/journal.pone.0100734.g002

LPS. No differences were observed with IL-5-responsive Eo/B CFU (Figure 4C).

We included an assessment of p38 MAPK inhibition, a kinase that is known to be upregulated by LPS in CB CD34<sup>+</sup> cells [11], and is involved in eosinophil differentiation from cord blood progenitors [22]. As shown in Figure 4F, blocking p38 MAPK in the presence of LPS reduced IL-5- ( $p = 0.013$ ) responsive Eo/B CFU, along with GM-CSF- ( $p = 0.015$ ) (Figure 4D) and IL-3- ( $p = 0.031$ ) responsive (Figure 4E) Eo/B CFU.

## Discussion

There is evidence that maternal cytokines play instructive roles in neonatal immune responses [6,15]. Interestingly, maternal atopy is often associated with deficient LPS signalling in infant CB [24–27], but the factor(s) that influence this relative deficiency are unclear. In the present report, we investigated how a T<sub>H</sub>2 microenvironment could influence CB progenitor cell Eo/B

differentiation responses to LPS [10]. We show for the first time that IL-4, but not IL-13, reduces CB progenitor Eo/B differentiation responses to LPS *in vitro*.

The cytokines IL-4 and IL-13 have been shown to influence hematopoietic progenitor cell chemotaxis [19] and Eo/B CFU [20] in human and murine systems, respectively. In these models, IL-13 was found to have an enhancing effect on both migratory responses to stromal-derived factor 1 $\alpha$  and on Eo/B differentiation. Our observation that IL-13 did not have an inhibitory effect on Eo/B CFU (Figure 2D–F) is in line with those of others [20] demonstrating promotion of eosinophilopoiesis. Conversely, there are reports in which IL-4 has an inhibitory role in eosinophilopoiesis of CB-derived progenitor cells [28,29]. Our findings therefore agree and extend these studies by demonstrating an inhibitory effect of IL-4 on LPS-induced Eo/B CFU (Figure 2A–B), which is dependent on signalling through IL-4R $\alpha$  (Figure 3A–B) and not IL-13R $\alpha$ 1 (Figure 3D–E). Our results demonstrate that IL-4 and IL-13, which have some redundancy in signalling due to shared

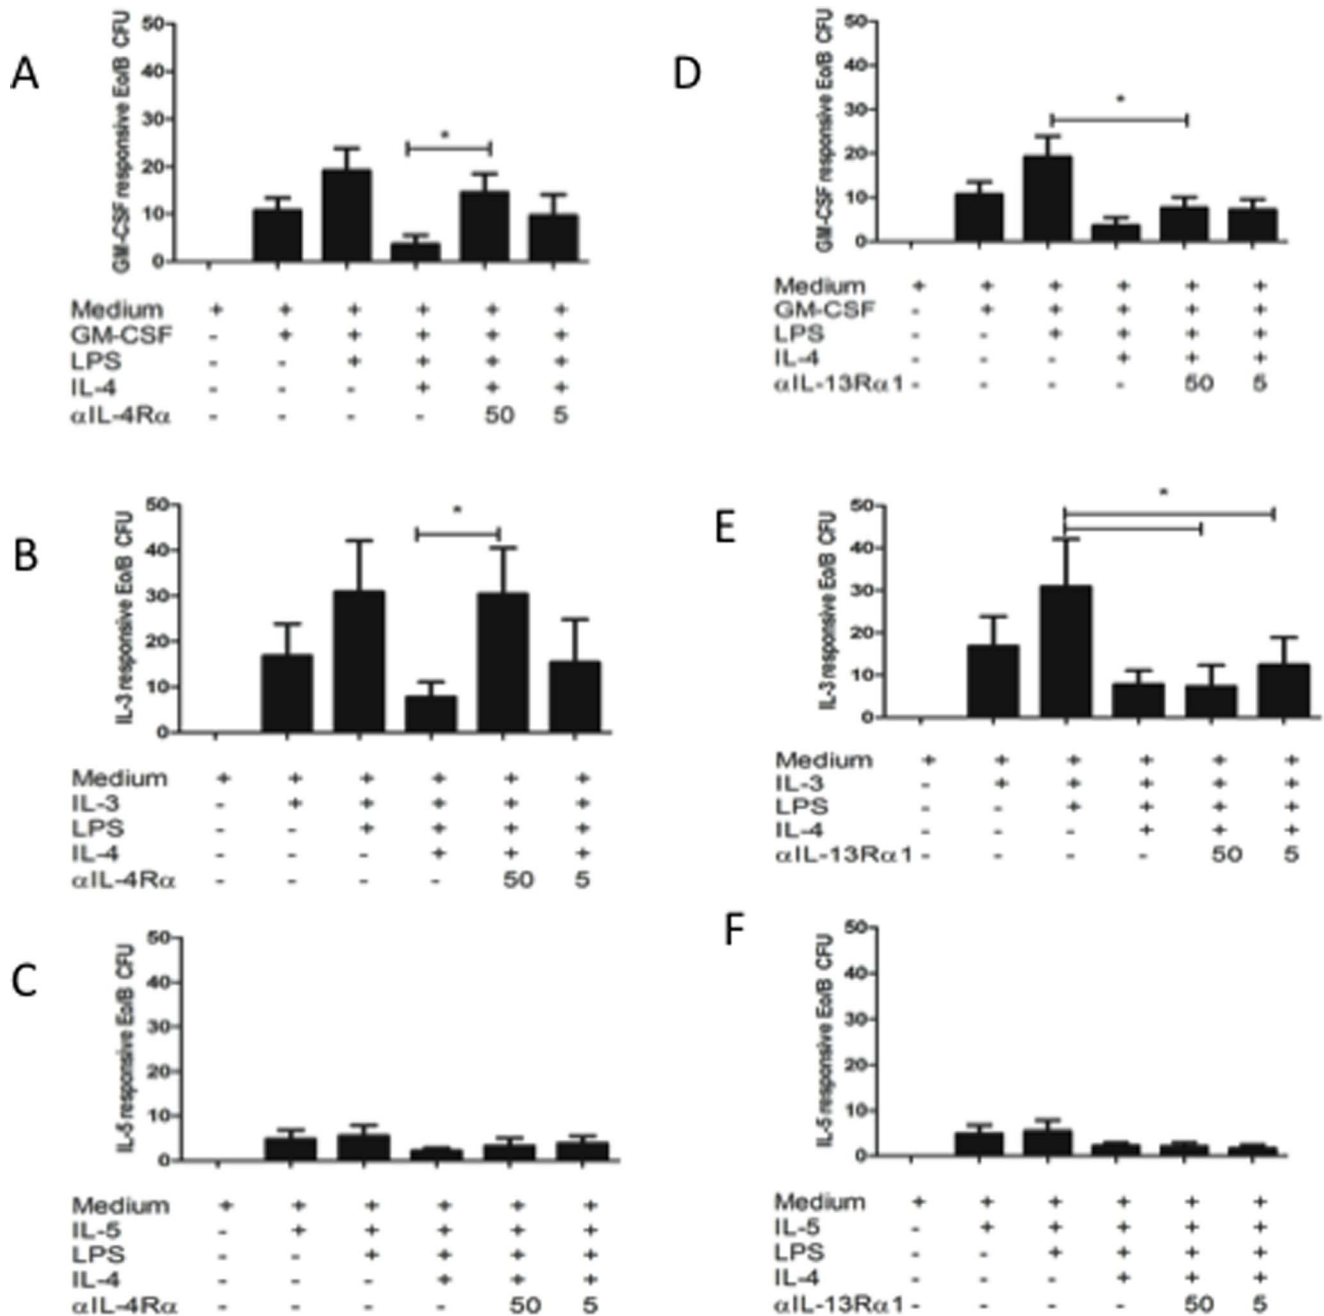

**Figure 3. Inhibition of IL-4R $\alpha$ , but not IL-13R $\alpha$ 1, recovers LPS-induced Eo/B CFU.** CB CD34<sup>+</sup> cells were cultured for 14 days (5% CO<sub>2</sub>, 37°C) with hematopoietic cytokines (A,D) GM-CSF (10 ng/mL), (B,E) IL-3 (1 ng/mL), (C,F) IL-5 (1 ng/mL), or with or without LPS, IL-4 and (A–C) anti-IL-4R $\alpha$ , or (B–F) anti-IL-13R $\alpha$ 1. Eo/B cultures are tight, granular clusters of 40 cells or more. Data are represented as mean  $\pm$  SEM of 5 experiments and significant findings were determined using ANOVA with post hoc Dunnett comparison and presented by an asterisk (\*),  $p < 0.05$ . doi:10.1371/journal.pone.0100734.g003

receptor subunits, can induce divergent responses when they ligate their cognate receptors [30]. Therefore, non-redundant effects on Eo/B CFU formation result from Type I (IL-4R $\alpha$ : $\gamma$ C) signalling by IL-4, as opposed to Type II (IL-4R $\alpha$ :IL-13R $\alpha$ 1) signalling.

It has recently been shown that maternal allergic history is associated with impaired LPS-induced phosphorylation of p38 MAPK and ERK 1/2 in peripheral blood monocytes [24,26]. Although these molecules can be induced by LPS stimulation in CB CD34<sup>+</sup> cells [11], we did not assess the effect of allergic risk in our previous study, but focused on the biological effect of LPS

stimulation of these cells [11]. Our previous findings that atopic-risk infants produce fewer LPS-induced Eo/B CFU, and stimulation of non-atopic mononuclear cells with IL-4 inhibits LPS signalling, much like that found in the cells of the atopic counterparts [24] add credence to our use of IL-4 to recapitulate the maternal allergic microenvironment *in utero* [12,13]. Therefore, our present findings suggest IL-4, which can be found in the CB of at-risk infants who subsequently go on to develop disease [12,13] has an inhibitory effect on Eo/B CFU [28,29] through altered CB CD34<sup>+</sup> cell responsiveness to LPS [10].

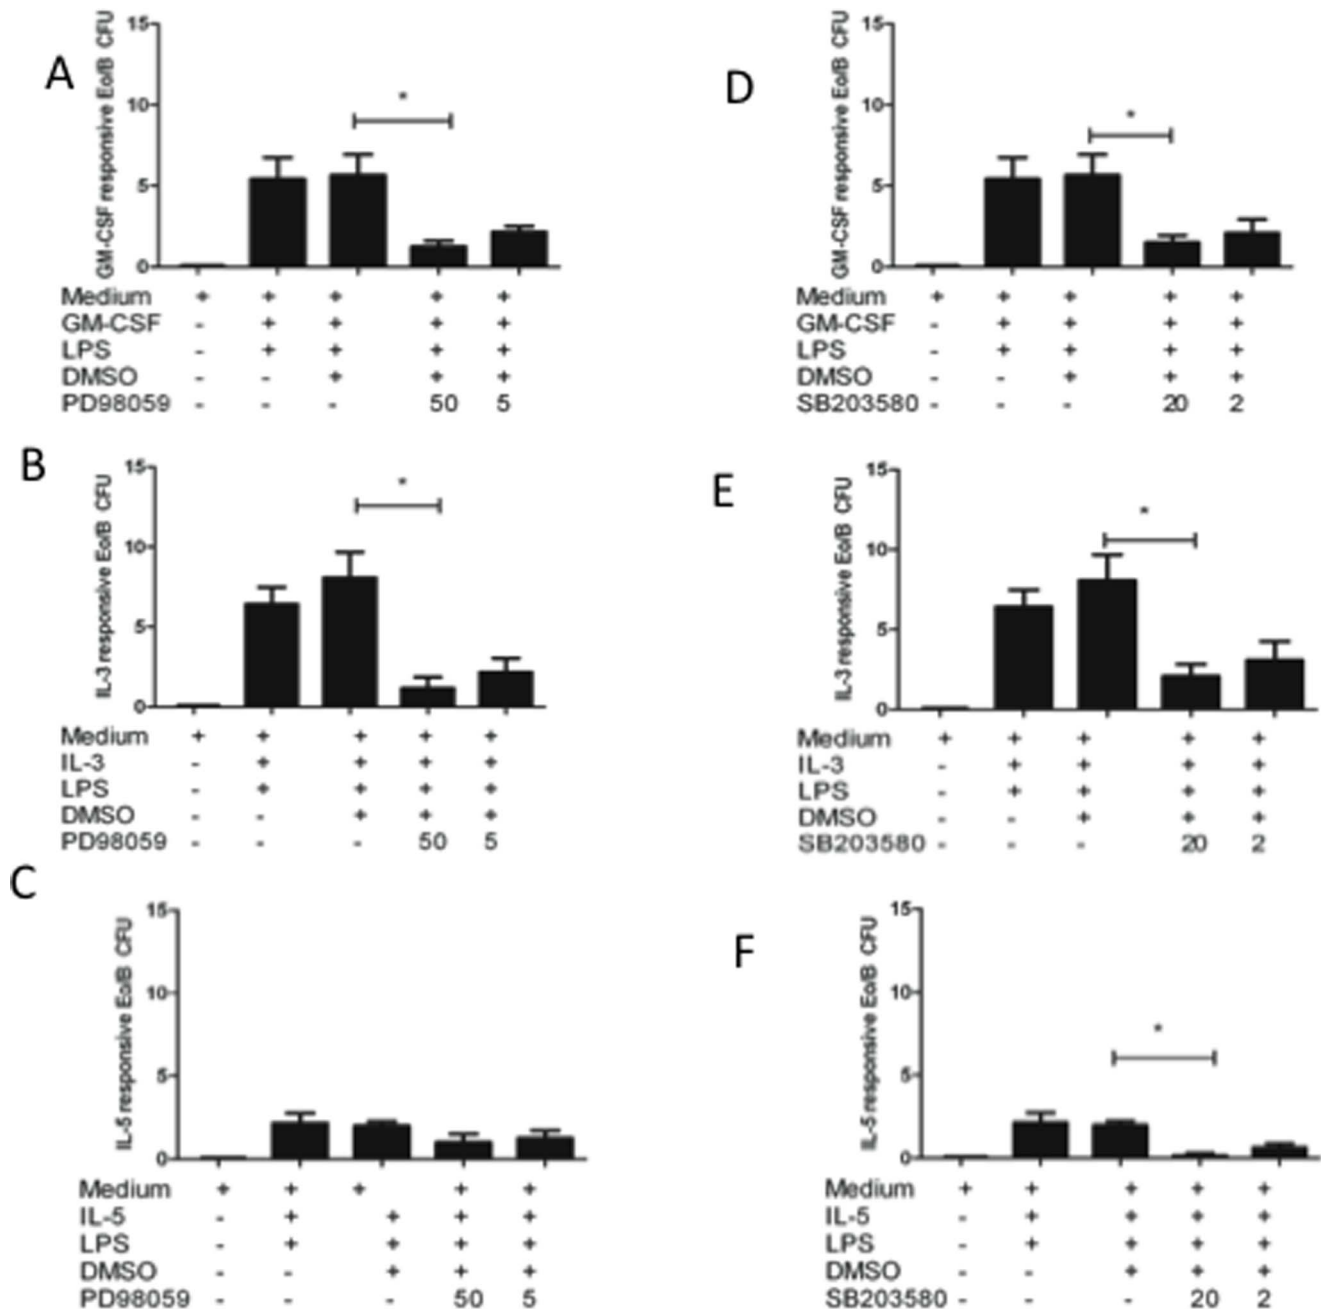

**Figure 4. Inhibition of ERK 1/2 decreases GM-CSF- and IL-3-responsive Eo/B CFU, but not IL-5-responsive colonies.** CD34<sup>+</sup> cells were incubated with a pharmacological inhibitor to A–C: ERK1/2 (PD98059) or D–F: p38 MAPK (SB203580) or DMSO vehicle control in methylcellulose cultures stimulated hematopoietic cytokines (A, D) GM-CSF (10 ng/mL), (B,E) IL-3 (1 ng/mL), (C,F) IL-5 (1 ng/mL) with LPS for 14 days (37°C and 5% CO<sub>2</sub>). Eo/B cultures are tight, granular clusters of 40 cells or more. Data are presented as mean  $\pm$  SEM of 6 experiments (B) and significant findings were determined using ANOVA with post hoc Dunnett comparison and presented by an asterisk (\*),  $p < 0.05$ . doi:10.1371/journal.pone.0100734.g004

The use of pharmacological inhibitors in the methylcellulose assay demonstrated the biological importance of IL-4 inhibition of ERK 1/2 signalling in CB CD34<sup>+</sup> cells. Although inhibition of p38 MAPK resulted in overall decreases in Eo/B CFU derived from stimulation by three hematopoietic cytokines—findings observed by others [22]—it was the inhibition of ERK 1/2 in the cultures that resulted in the specific inhibition of GM-CSF- and IL-3-responsive Eo/B CFU. Our colony data (Figure 4) not only reinforce the importance of MAPK signalling in eosinophil differentiation [21],

but also corroborate our phospho-flow analysis illustrating reduced ERK 1/2 expression after IL-4 stimulation (Figure 1C). The addition of IL-4 to the cultures not only reduced both GM-CSF- and IL-3-responsive Eo/B CFU in the presence of LPS (Figure 2A–B), but reduced LPS-induced ERK 1/2 signalling (Figure 1C), a finding supported by others [24]. Furthermore, *in vitro* inhibition of ERK 1/2 significantly reduced both GM-CSF- and IL-3-responsive Eo/B CFU (as opposed to IL-5 responsive

colonies), which reinforces the specificity for ERK signalling in IL-4 inhibition of Eo/B CFU formation.

Our *in vitro* work may suggest mechanistic underpinnings for other *in vitro* [31] and *in vivo* [32–34] observations in relation to these  $T_H2$  cytokines and eosinophil counts. It has been shown that patients with atopic dermatitis, a  $T_H2$ -driven disease, have significantly greater peripheral blood eosinophil apoptosis in response to IL-4 [31]. In connection with our findings presented herein, this may suggest that the inhibitory effect of IL-4 on eosinophil survival ranges from immature eosinophil progenitor cells to the mature granulocyte. Preclinical models show success of *in vivo* blockade with IL-4, whereas a convincing effect on eosinophil numbers in humans has been disappointing. Studies by Wenzel et al., [32,33] and Gauvreau et al., [34] have shown that blocking IL-4R $\alpha$  improves asthmatic FEV<sub>1</sub> responses, but has no effect on sputum eosinophils. Given that IL-4 inhibits hematopoietic progenitor cell differentiation into eosinophils (Figure 2A–B) through IL-4R $\alpha$  (Figure 3A–B), blockade of IL-4R $\alpha$  (and subsequent blockade of IL-4 signalling) may result in the ability of these progenitor cells found in the bronchial mucosa of asthmatics [35] to differentiate, associated with a lack of reduction in airway eosinophil counts.

The seemingly paradoxical finding that IL-4, a pro-allergic cytokine, reduces LPS-induced Eo/B CFU, may relate to reports suggesting an inverse relationship between eosinophilia and particular ratios of  $T_H2$  cytokines in allergic diseases [31]. For example, in patients with atopic dermatitis, acute lesions are associated with increased IL-4 mRNA with lymphocytic infiltration, whereas chronic lesions have a predominance of IL-5 mRNA with eosinophil infiltration [36]. Additionally, intrinsic asthma

denoted by normal IgE and IL-4 levels, is associated with increased eosinophilia and IL-5 levels, compared to those with extrinsic asthma characterized by increased IL-5 and IL-4 [37]. Therefore, not only may higher IL-4 levels at the site of inflammation be related to reduced eosinophilia in allergic tissue [36,37], but, *in utero* it may contribute to potential gene (e.g., atopy/IL-4) by environment (e.g., LPS) interactions which influence neonatal progenitor cell Eo/B CFU formation. Therefore, *in utero* or inflammatory tissue site  $T_H2$  cytokine milieu may play a role in determining the fate of eosinophils and their progenitors.

Differential responses of CB CD34<sup>+</sup> cells between low- and high-atopic risk neonates may depend on cytokine influences *in utero*, suggesting that an *in utero* atopic ( $T_H2$ ) cytokine milieu can influence the innate immune responses of neonatal CD34<sup>+</sup> cells [10] and thus the development of allergic inflammatory responses in early life.

## Acknowledgments

We would like to thank the nursing staff at McMaster Medical Centre for graciously collecting the CB samples. Additional thanks to Dr. Thabane for his statistical advice and to Lynne Larocque for helping with the manuscript.

## Author Contributions

Conceived and designed the experiments: PR RS JD. Performed the experiments: PR. Analyzed the data: PR GMG RS JD. Contributed reagents/materials/analysis tools: JD. Wrote the paper: PR GMG RS JD.

## References

- Prescott SL (2010) Allergic disease: understanding how in utero events set the scene. *Proc Nutr Soc* 69: 366–372.
- von Mutius E, Vercelli D (2010) Farm living: effects on childhood asthma and allergy. *Nat Rev Immunol* 10: 861–868.
- Ege MJ, Bieli C, Frei R, van Strien RT, Riedler J, et al. (2006) Prenatal farm exposure is related to the expression of receptors of the innate immunity and to atopic sensitization in school-age children. *J Allergy Clin Immunol* 117: 817–823.
- Roduit C, Wohlgensinger J, Frei R, Bitter S, Bieli C, et al. (2011) Prenatal animal contact and gene expression of innate immunity receptors at birth are associated with atopic dermatitis. *J Allergy Clin Immunol* 127: 179–185, 185.e1.
- Schaub B, Liu J, Hoppler S, Schleich I, Huehn J, et al. (2009) Maternal farm exposure modulates neonatal immune mechanisms through regulatory T cells. *J Allergy Clin Immunol* 123: 774–782.e5.
- Hinz D, Bauer M, Roder S, Olek S, Huehn J, et al. (2012) Cord blood Tregs with stable FOXP3 expression are influenced by prenatal environment and associated with atopic dermatitis at the age of one year. *Allergy* 67: 380–389.
- Upham JW, Hayes LM, Lundahl J, Sehmi R, Denburg JA (1999) Reduced expression of hemopoietic cytokine receptors on cord blood progenitor cells in neonates at risk for atopy. *J Allergy Clin Immunol* 104: 370–375.
- Denburg JA, Hatfield HM, Cyr MM, Hayes L, Holt PG, et al. (2005) Fish oil supplementation in pregnancy modifies neonatal progenitors at birth in infants at risk of atopy. *Pediatr Res* 57: 276–281.
- Fernandes R, Kusel M, Cyr M, Sehmi R, Holt K, et al. (2008) Cord blood hemopoietic progenitor profiles predict acute respiratory symptoms in infancy. *Pediatr Allergy Immunol* 19: 239–247.
- Reece P, Thanendran A, Crawford L, Tulic MK, Thabane L, et al. (2011) Maternal allergy modulates cord blood hematopoietic progenitor Toll-like receptor expression and function. *J Allergy Clin Immunol* 127: 447–453.
- Reece P, Baatjes AJ, Cyr MM, Sehmi R, Denburg JA (2013) Toll-like receptor-mediated eosinophil-basophil differentiation: autocrine signalling by granulocyte-macrophage colony-stimulating factor in cord blood hematopoietic progenitors. *Immunology* 139: 256–264.
- Bjorksten B, Borres MP, Einarsson R (1995) Interleukin-4, soluble CD23 and interferon-gamma levels in serum during the first 18 months of life. *Int. Arch. Allergy Immunol* 107: 34–36.
- Oymar K, Laerdal A, Bjerknes R (2000) Soluble CD30 and CD23 in cord blood are not related to atopy in early childhood. *Pediatr Allergy Immunol* 11: 220–224.
- Hinz D, Simon JC, Maier-Simon C, Milkova L, Roder S, et al. (2010) Reduced maternal regulatory T cell numbers and increased T helper type 2 cytokine production are associated with elevated levels of immunoglobulin E in cord blood. *Clin Exp Allergy* 40: 419–426.
- Brown M, Gustafson M, Saldana S, Baradaran A, Miller H, et al. (2004) Correlation of human decidua and cord blood mononuclear cell cytokine production. *Hum Immunol* 65: 1336–1343.
- Okoye IS, Wilson MS (2011) CD4<sup>+</sup> T helper 2 cells—microbial triggers, differentiation requirements and effector functions. *Immunology* 134: 368–377.
- Radinger M, Lotvall J (2009) Eosinophil progenitors in allergy and asthma - do they matter? *Pharmacol Ther* 121: 174–184.
- Huang SK, Xiao HQ, Kleine-Tebbe J, Paciotti G, Marsh DG, et al. (1995) IL-13 expression at the sites of allergen challenge in patients with asthma. *J Immunol* 155: 2688–2694.
- Punia N, Smith S, Thomson JV, Irshad A, Nair P, et al. (2012) Interleukin-4 and interleukin-13 prime migrational responses of haemopoietic progenitor cells to stromal cell-derived factor-1 $\alpha$ . *Clin Exp Allergy* 42: 255–264.
- Queto T, Gaspar-Elsas MI, Masid-de-Brito D, Vasconcelos ZF, Ferraris FK, et al. (2010) Cysteinyl-leukotriene type 1 receptors transduce a critical signal for the up-regulation of eosinophilopoiesis by interleukin-13 and eotaxin in murine bone marrow. *J Leukoc Biol* 87: 885–893.
- Adachi T, Choudhury BK, Stafford S, Sur S, Alam R (2000) The differential role of extracellular signal-regulated kinases and p38 mitogen-activated protein kinase in eosinophil functions. *J Immunol* 165: 2198–2204.
- Geest CR, Buitenhuis M, Laarhoven AG, Bierings MB, Bruin MC, et al. (2009) p38 MAP kinase inhibits neutrophil development through phosphorylation of C/EBP $\alpha$  on serine 21. *Stem Cells* 27: 2271–2282.
- Krutzik PO, Hale MB, Nolan GP (2005) Characterization of the murine immunological signaling network with phosphospecific flow cytometry. *J Immunol* 175: 2366–2373.
- Prefontaine D, Banville-Langelier AA, Fiset PO, Guay J, An J, et al. (2010) Children with atopic histories exhibit impaired lipopolysaccharide-induced Toll-like receptor-4 signalling in peripheral monocytes. *Clin Exp Allergy* 40: 1648–1657.
- Amoudruz P, Holmlund U, Malmstrom V, Trollmo C, Bremme K, et al. (2005) Neonatal immune responses to microbial stimuli: is there an influence of maternal allergy? *J Allergy Clin Immunol* 115: 1304–1310.
- Saghafian-Hedengren S, Holmlund U, Amoudruz P, Nilsson C, Sverremark-Ekstrom E (2008) Maternal allergy influences p38-mitogen-activated protein kinase activity upon microbial challenge in CD14<sup>+</sup> monocytes from 2-year-old children. *Clin Exp Allergy* 38: 449–457.

27. Amoudruz P, Holmlund U, Saghafian-Hedengren S, Nilsson C, Sverre-remark-Ekstrom E (2009) Impaired Toll-like receptor 2 signalling in monocytes from 5-year-old allergic children. *Clin Exp Immunol* 155: 387–394.
28. Kajitani H, Enokihara H, Tsunogake S, Takano N, Saito K, et al. (1989) Effect of human recombinant interleukin 4 on in vitro granulopoiesis of human bone marrow cells. *Growth Factors* 1: 283–286.
29. Ochiai K, Iwamoto I, Takahashi H, Yoshida S, Tomioka H, et al. (1995) Effect of IL-4 and interferon-gamma (IFN-gamma) on IL-3- and IL-5-induced eosinophil differentiation from human cord blood mononuclear cells. *Clin Exp Immunol* 99: 124–128.
30. Chatila TA (2004) Interleukin-4 receptor signaling pathways in asthma pathogenesis. *Trends Mol. Med.* 10: 493–499.
31. Wedi B, Raap U, Lewrick H, Kapp A (1998) IL-4-induced apoptosis in peripheral blood eosinophils. *J Allergy Clin Immunol* 102: 1013–1020.
32. Wenzel S, Wilbraham D, Fuller R, Getz EB, Longphre M (2007) Effect of an interleukin-4 variant on late phase asthmatic response to allergen challenge in asthmatic patients: results of two phase 2a studies. *Lancet* 370: 1422–1431.
33. Wenzel S, Ford L, Pearlman D, Spector S, Sher L, et al. (2013) Dupilumab in persistent asthma with elevated eosinophil levels. *N Engl J Med* 368: 2455–2466.
34. Gauvreau GM, Boulet LP, Cockcroft DW, Fitzgerald JM, Carlsten C, et al. (2011) Effects of interleukin-13 blockade on allergen-induced airway responses in mild atopic asthma. *Am J Respir Crit Care Med* 183: 1007–1014.
35. Robinson DS, Damia R, Zeibecoglou K, Molet S, North J, et al. (1999) CD34(+)/interleukin-5Ralpha messenger RNA+ cells in the bronchial mucosa in asthma: potential airway eosinophil progenitors. *Am J Respir Cell Mol Biol* 20: 9–13.
36. Hamid Q, Boguniewicz M, Leung DY (1994) Differential in situ cytokine gene expression in acute versus chronic atopic dermatitis. *J Clin Invest* 94: 870–876.
37. Walker C, Bode E, Boer L, Hansel TT, Blaser K, et al. (1992) Allergic and nonallergic asthmatics have distinct patterns of T-cell activation and cytokine production in peripheral blood and bronchoalveolar lavage. *Am Rev Respir Dis* 146: 109–115.
